# Supplementary material for: Implication of REDD1 in the activation of inflammatory pathways
Source: PubMed Central journal article supplement (PMC5539207; doi:10.1038/s41598-017-07182-z), 2017-08-01
Supplement: 41598_2017_7182_MOESM1_ESM.pdf [file 41598_2017_7182_MOESM1_ESM.pdf]

## Implication of REDD1 in the activation of inflammatory pathways

Faustine Pastor, Karine Dumas, Marie-Astrid Barthélémy, Claire Regazzetti, Noémie Druelle, Pascal Peraldi, Mireille Cormont, Jean-François Tanti, Sophie Giorgetti-Peraldi

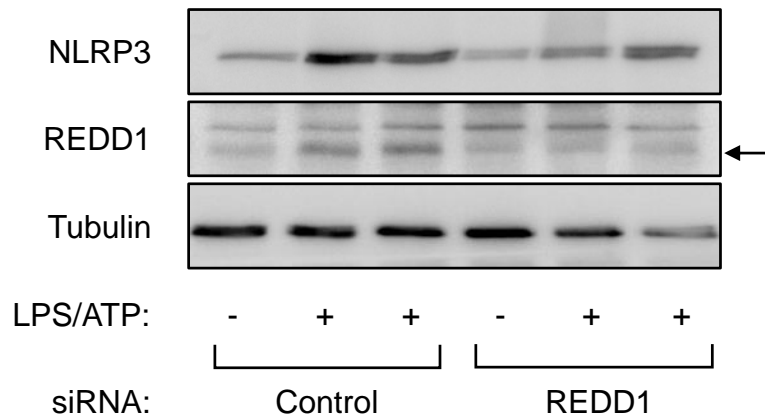

**Supplementary Figure S1:** J774 macrophages were transfected with siRNA against REDD1 and analyzed by immunoblots with indicated antibodies

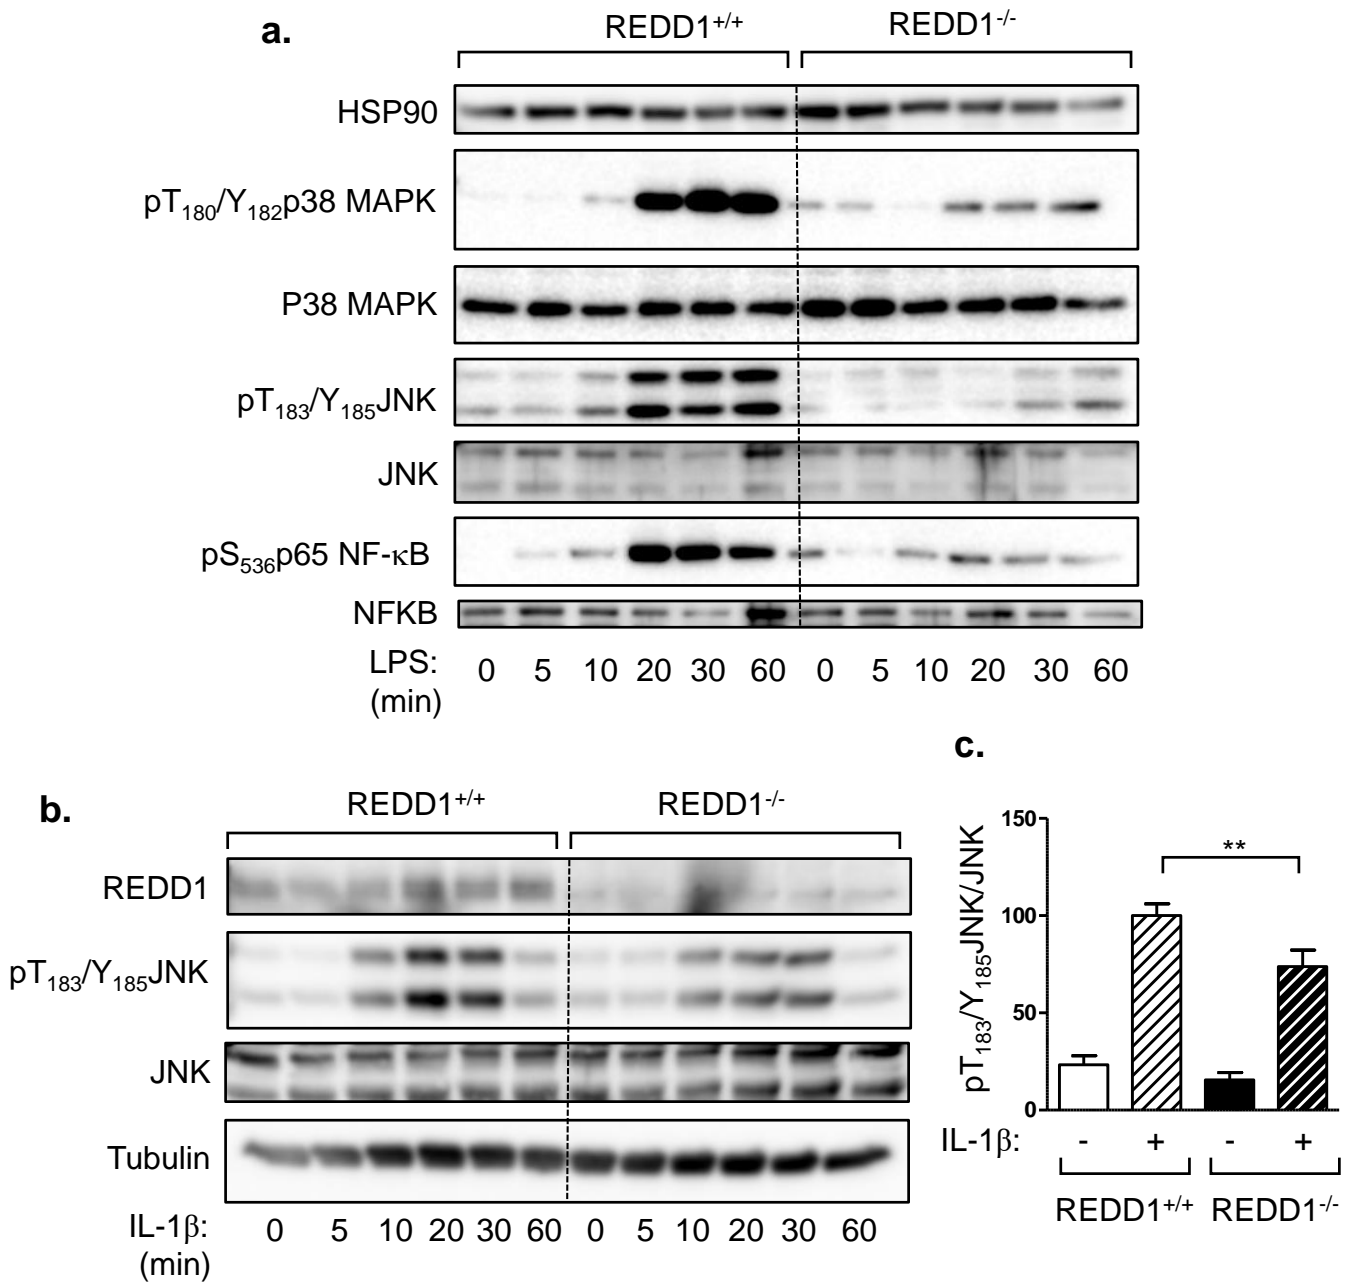

**Supplementary Figure S2: Activation of p38 MAPK, JNK and NF-κB was impaired in MEF REDD1<sup>-/-</sup> in response to LPS and IL-1β**

REDD1<sup>+/+</sup> and REDD1<sup>-/-</sup> MEF were stimulated with LPS (100 ng/ml) (a) or IL-1β (20 ng/ml) (b) for indicated periods of time. Cell lysates were analyzed by immunoblots with indicated antibodies. c: Quantification of pT<sub>183</sub>/Y<sub>185</sub> JNK in response to IL-1β stimulation for 20 minutes (n=4 independent experiments in duplicate, \*\* p<0.01).

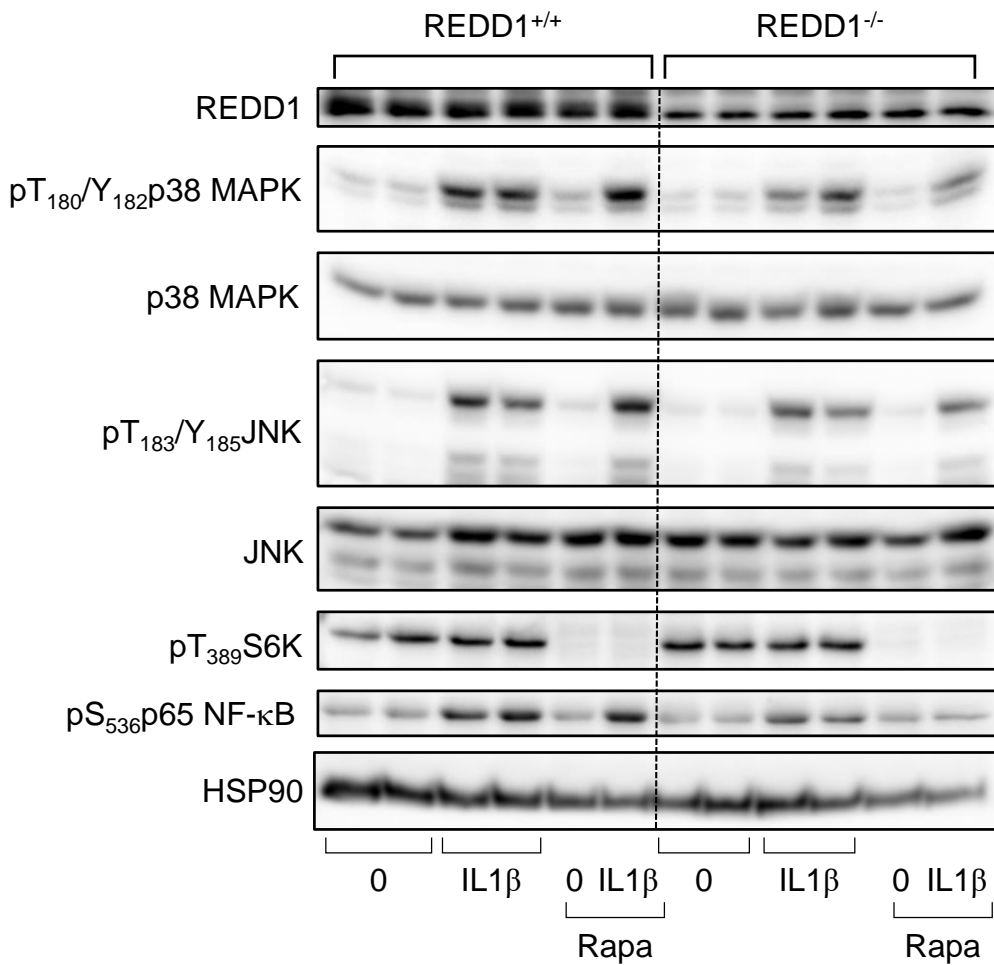

**Supplementary Figure S3: Inhibition of inflammation in REDD1<sup>-/-</sup> cells is mTORC1 independent**

REDD1<sup>+/+</sup> and REDD1<sup>-/-</sup> MEF were treated with rapamycin (rapa) 40 nM for 45 minutes before being stimulated with IL-1 $\beta$  for 20 minutes. Cell lysates were analyzed by immunoblots with indicated antibodies.
